# Supplementary material
Source: PubMed Central journal article supplement (PMC4874922)

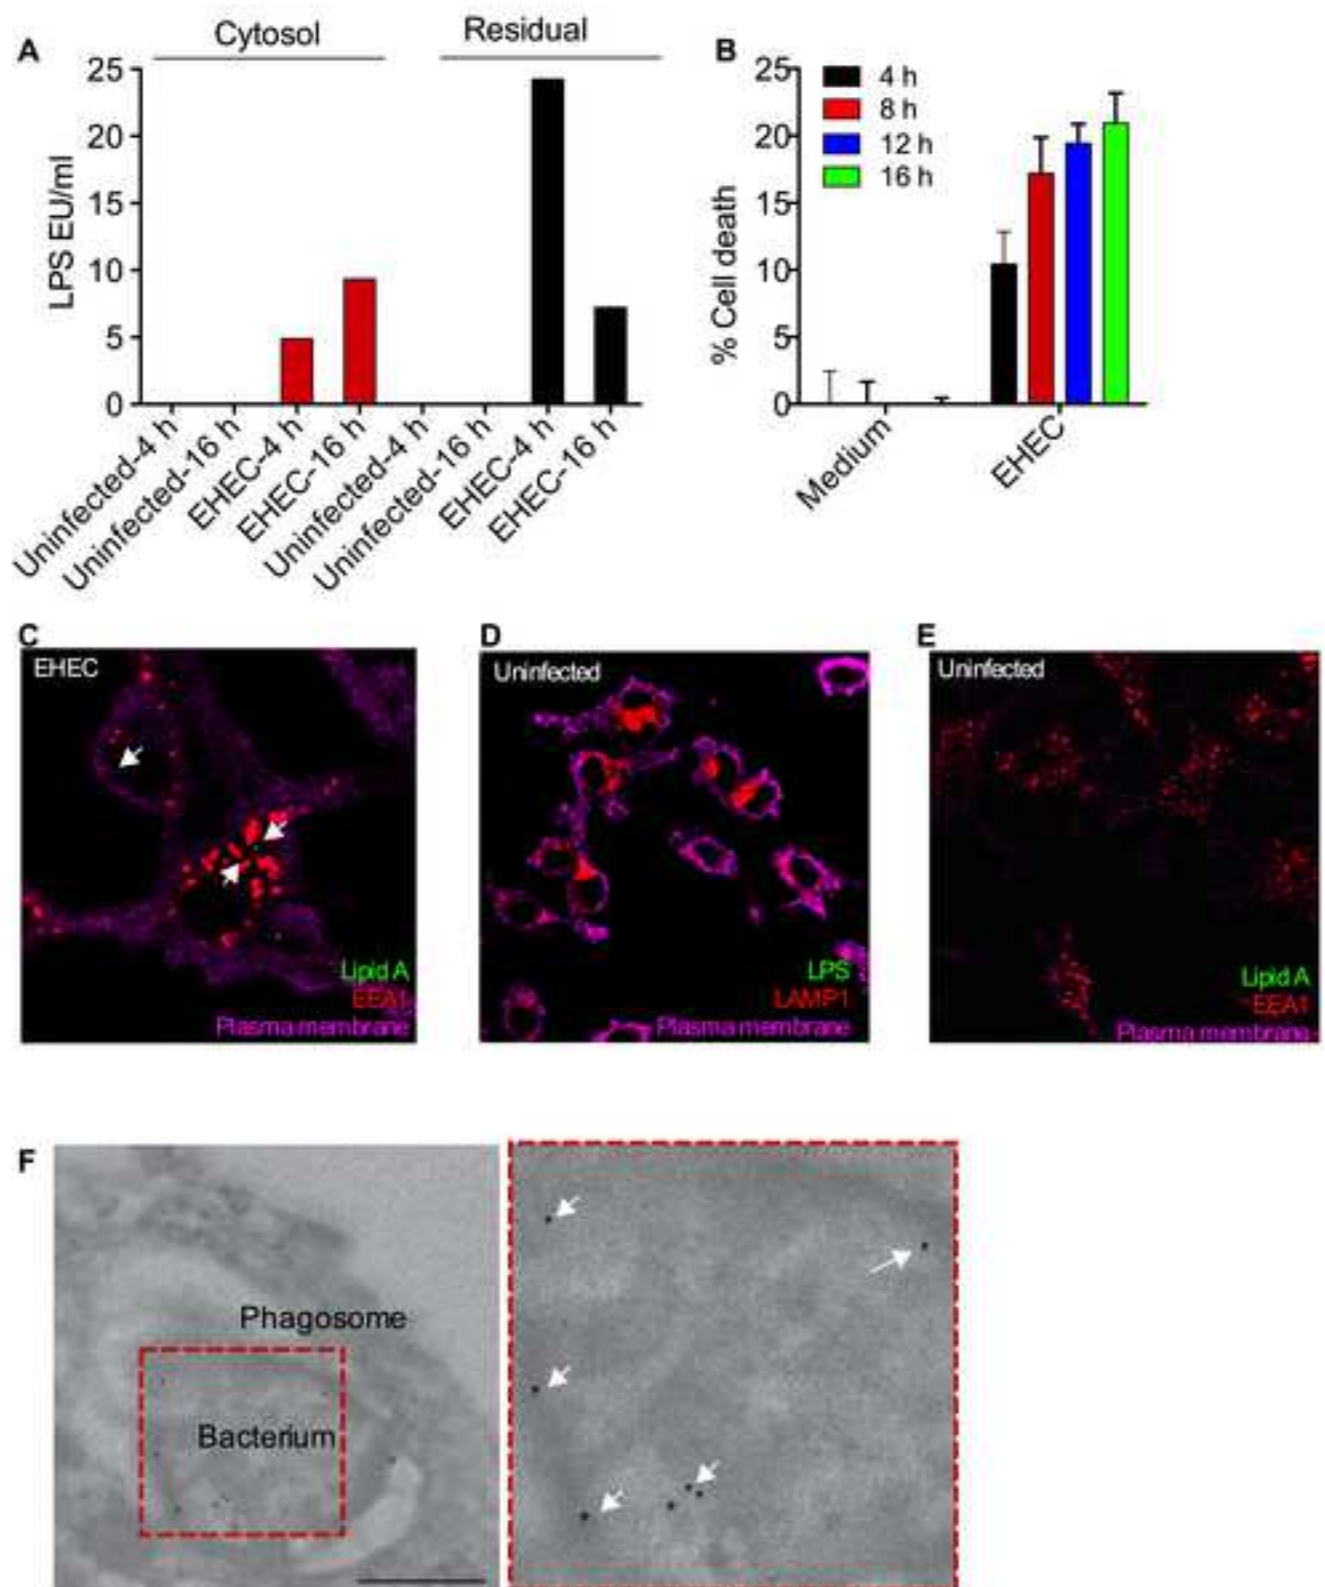

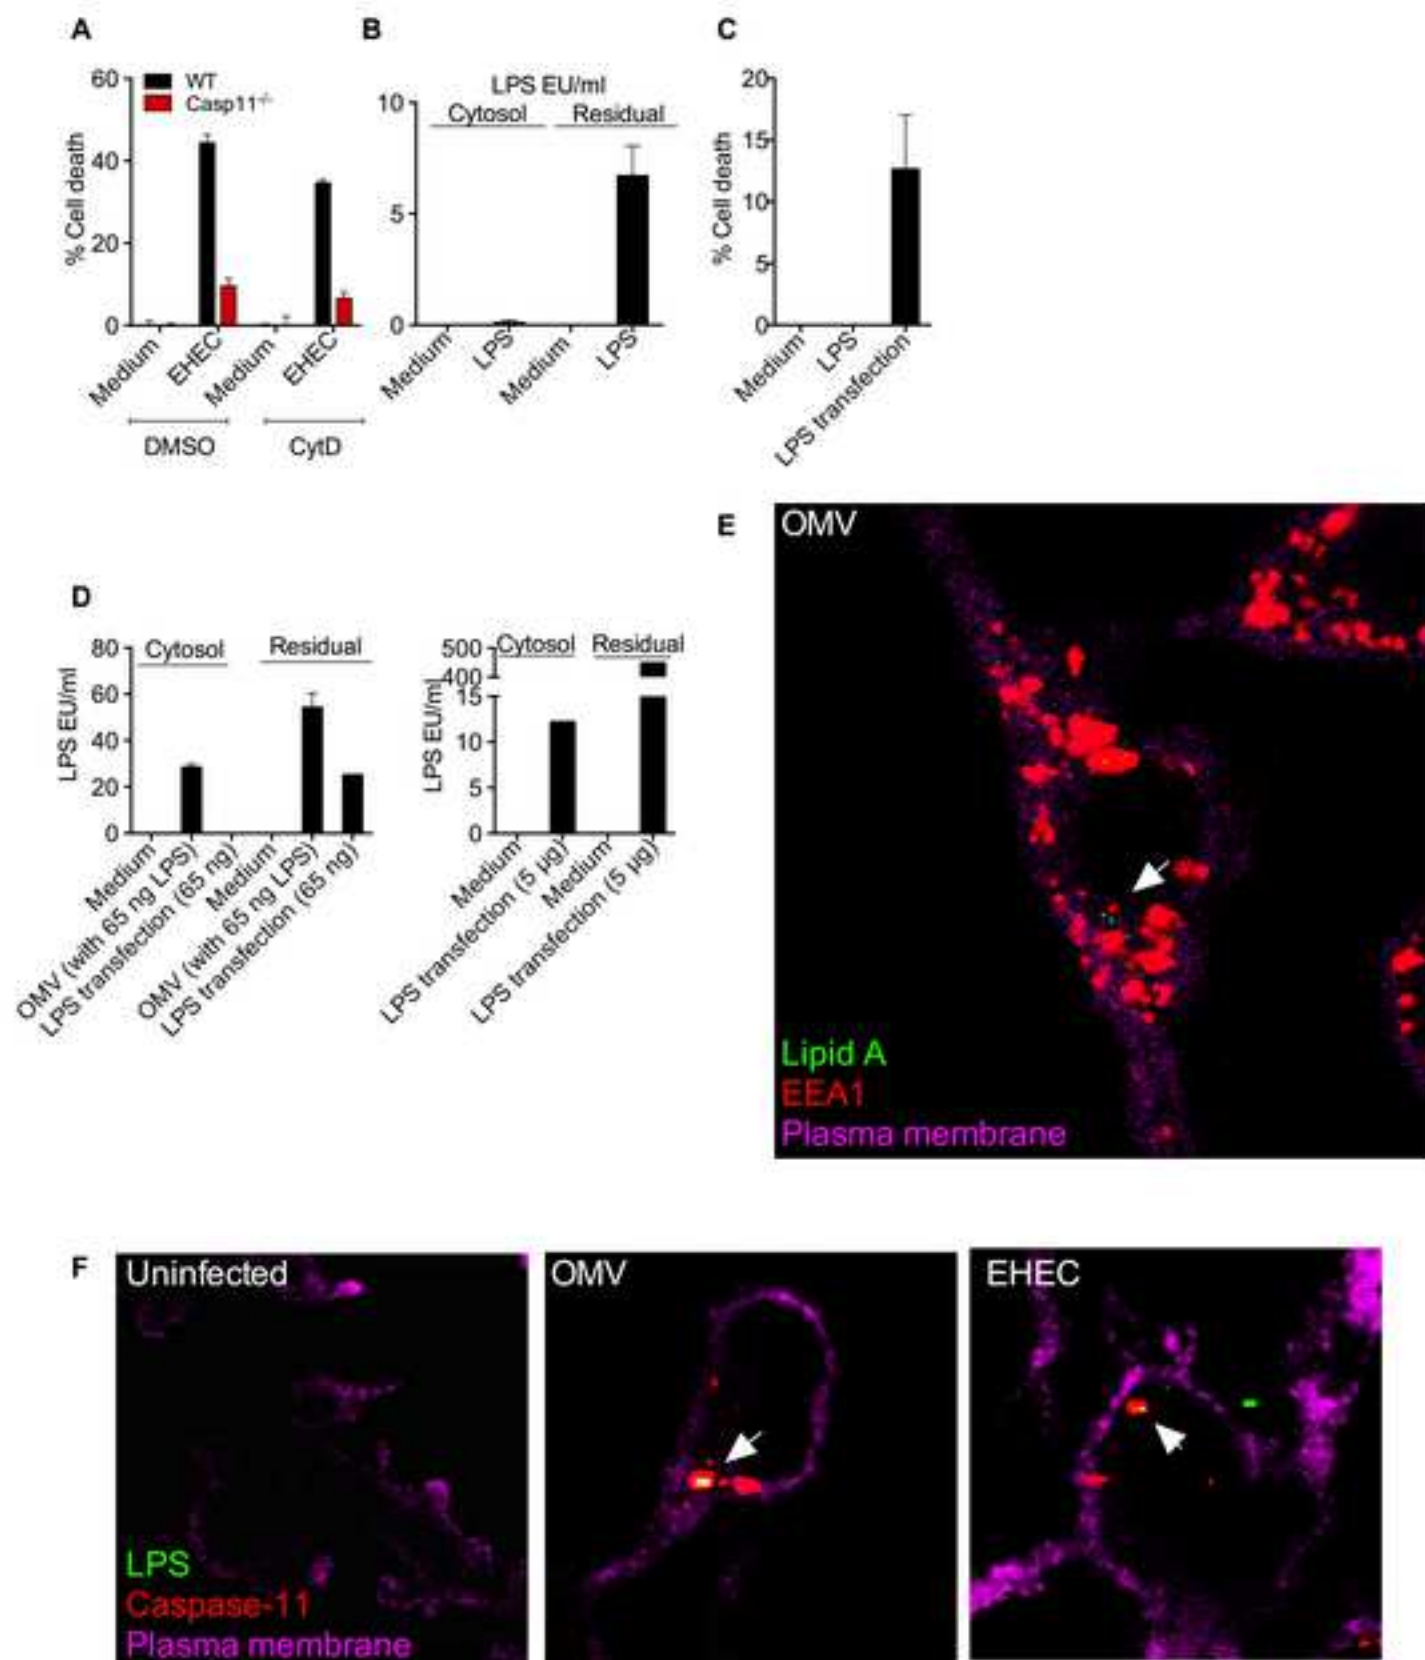

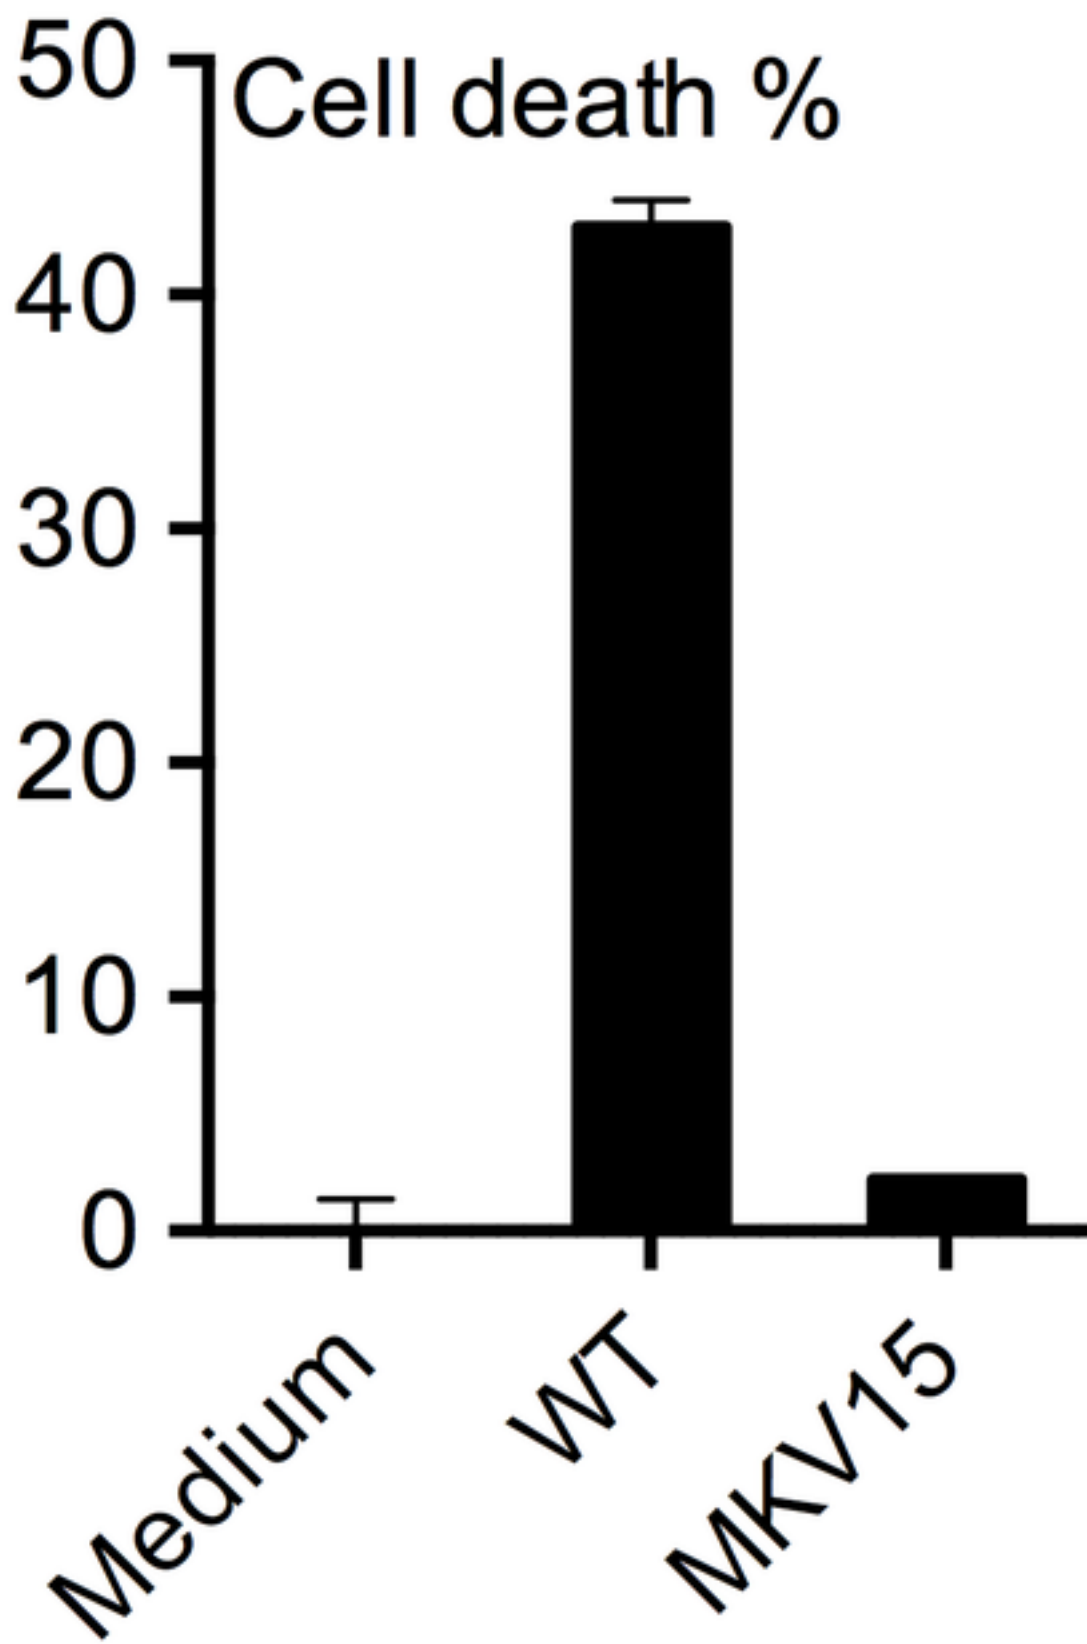

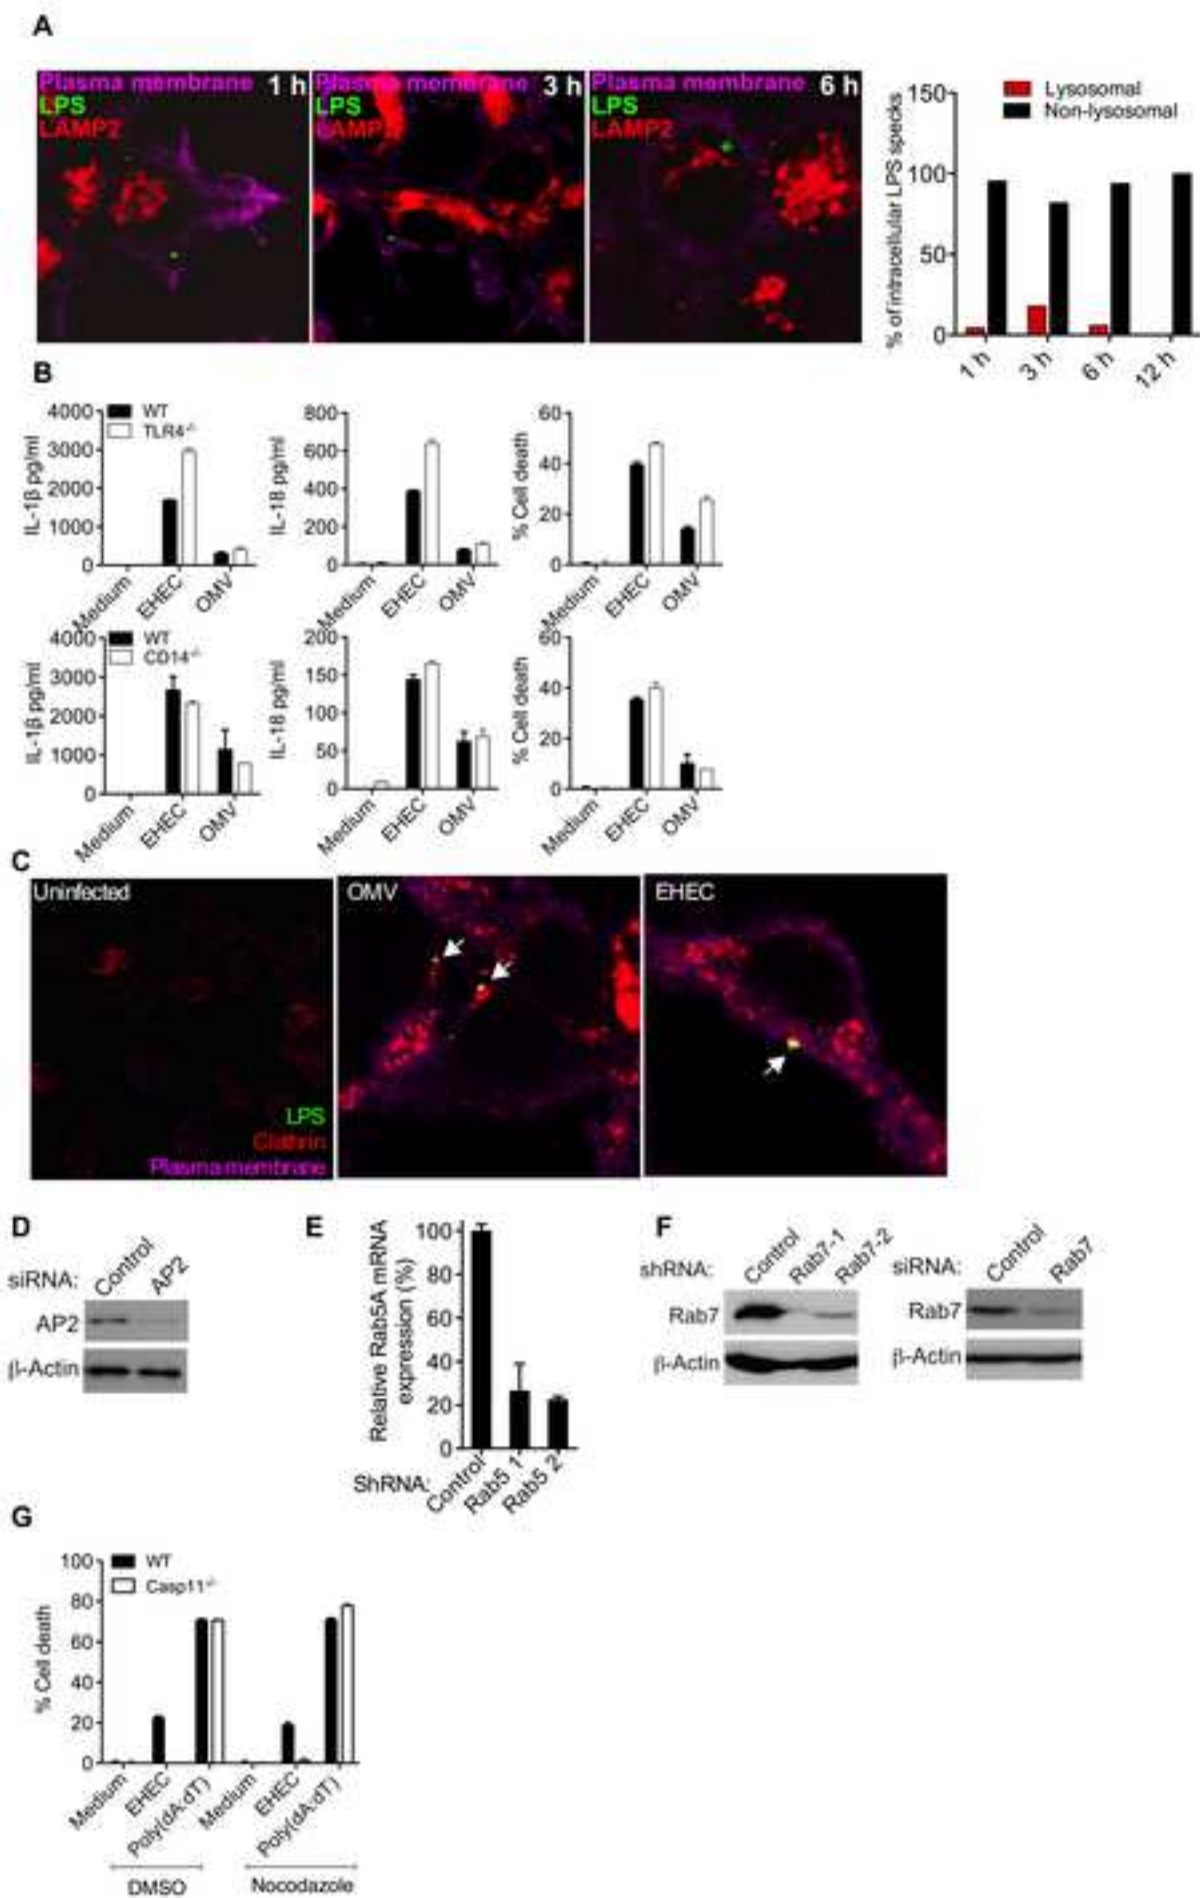

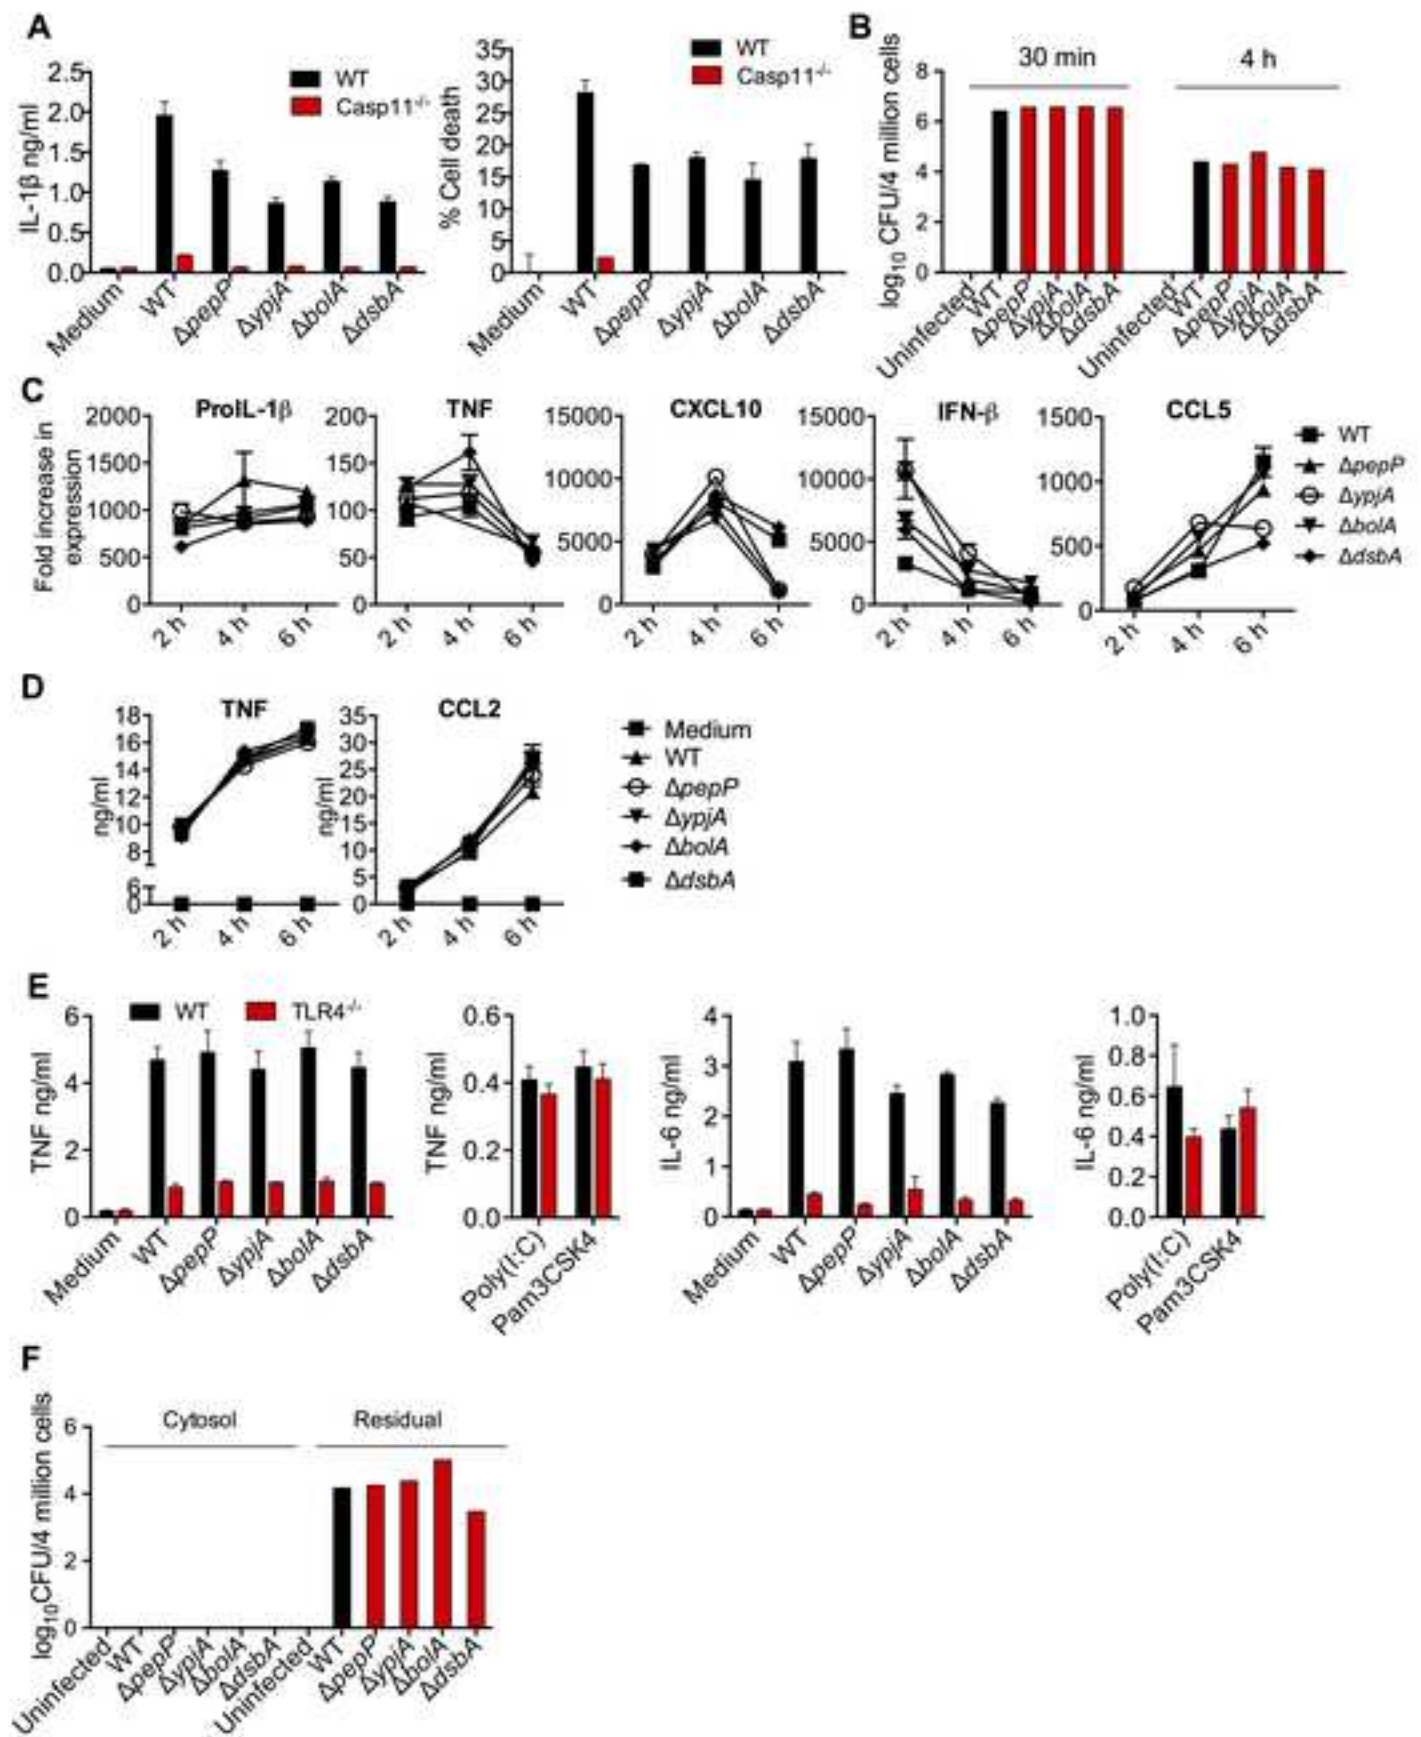

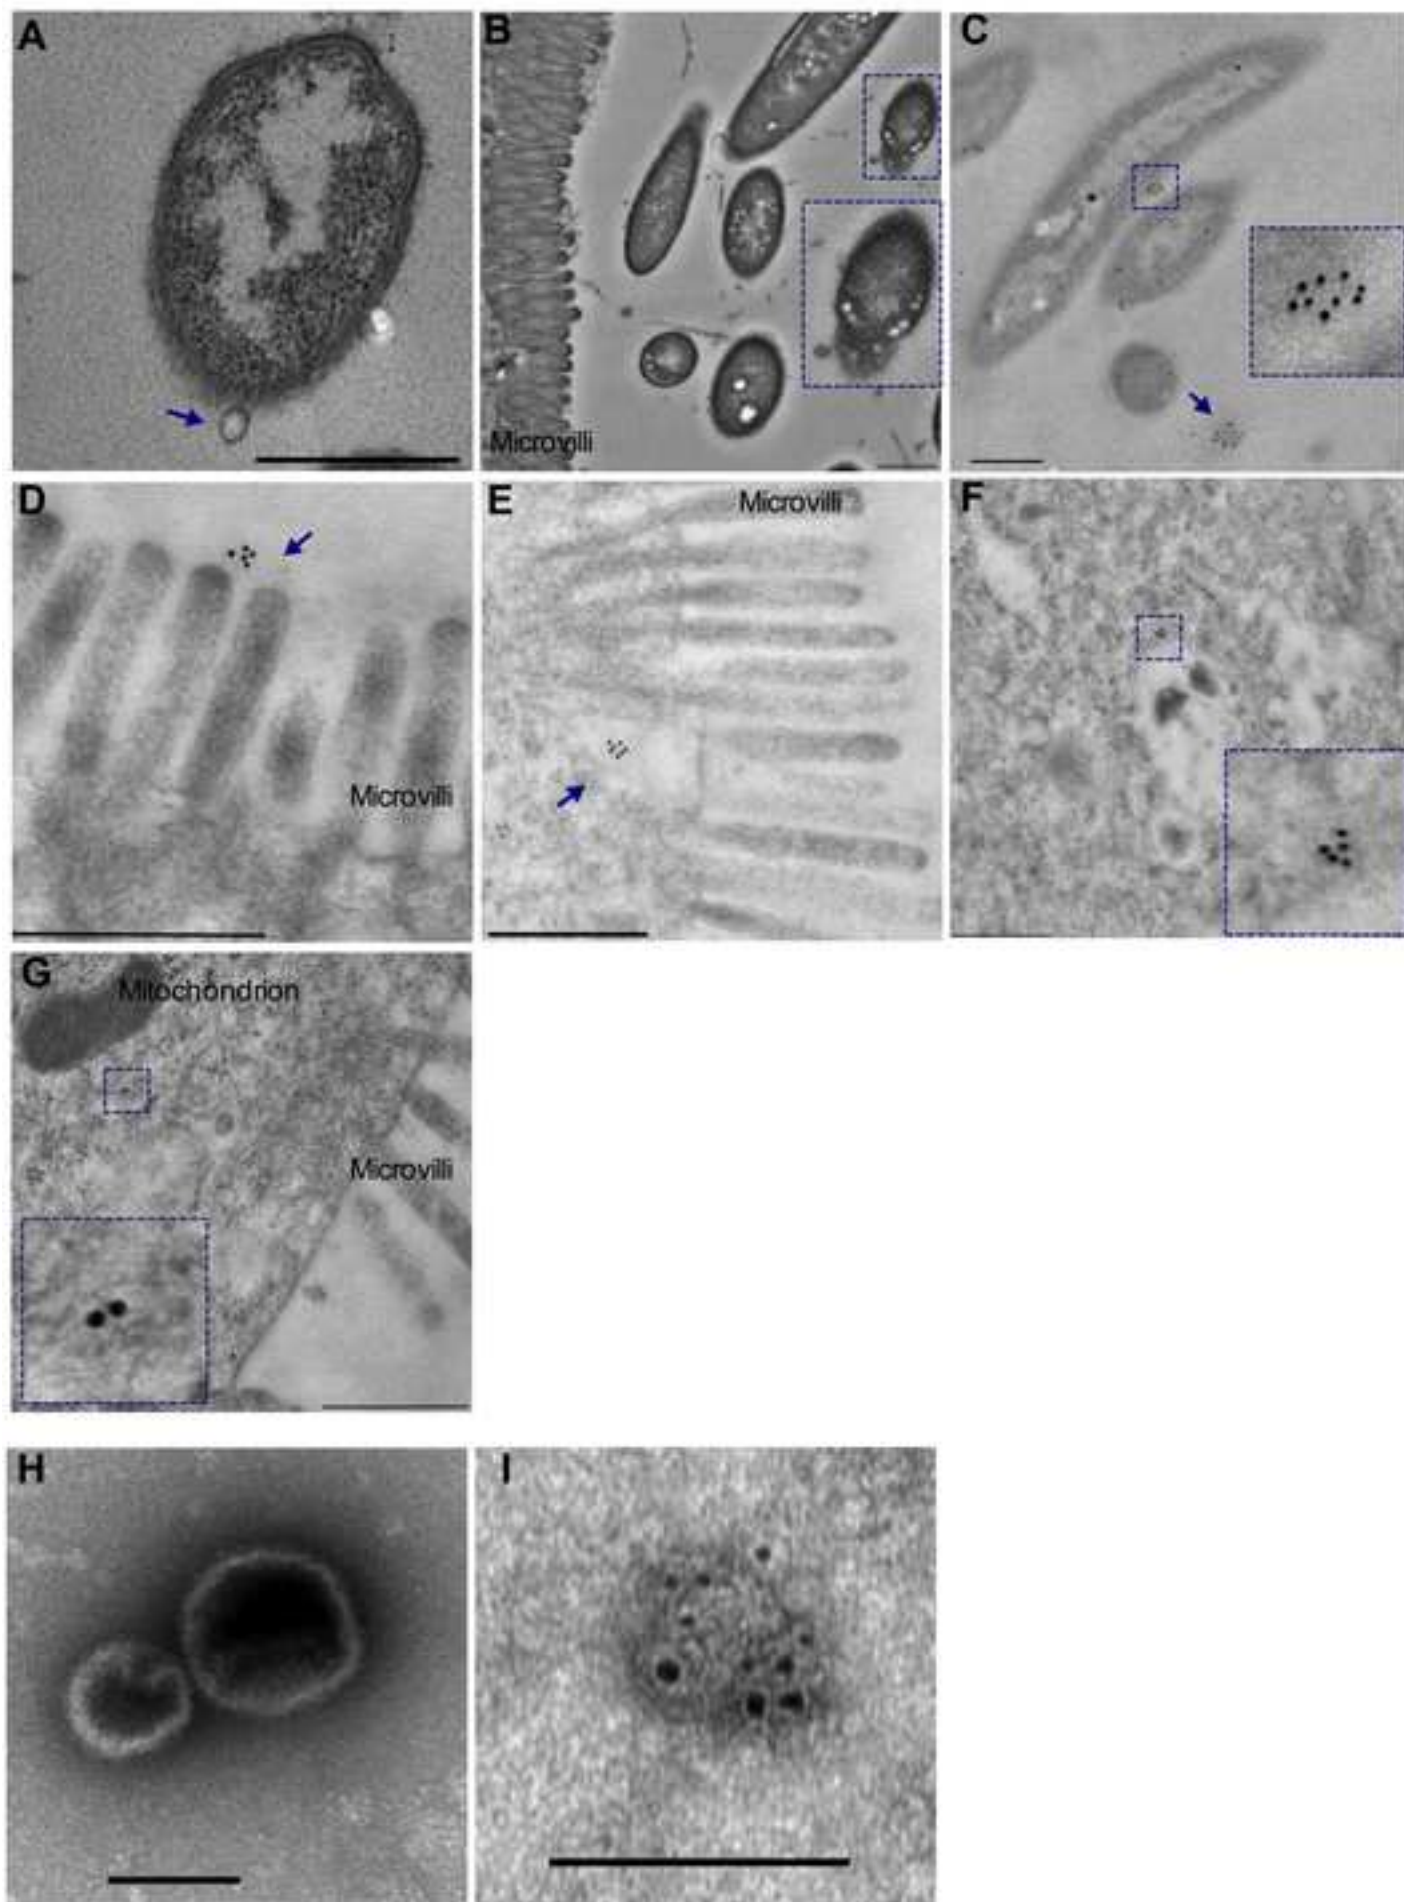

Supplement: NIHMS776745-supplement-01.pdf [file NIHMS776745-supplement-01.pdf]
